# Supplementary material for: Role of defect density in the TiOx protective layer of the n-Si photoanode for efficient photoelectrochemical water splitting
Source: Royal Society of Chemistry journal article supplement (doi:10.1039/d2ta07082k), 2023-01-01
Supplement: d2ta07082k1.pdf [file d2ta07082k1.pdf]

## Supporting Information

# Role of defect density in $\text{TiO}_x$ protective layer of $n$ -Si photoanode for efficient photoelectrochemical water splitting

Songwoung Hong, Woo Lee, Yun Jeong Hwang, Seungwoo Song, Seungwook Choi, Hyun Rhu, Jeong Hyun Shim, Ansoon Kim\*

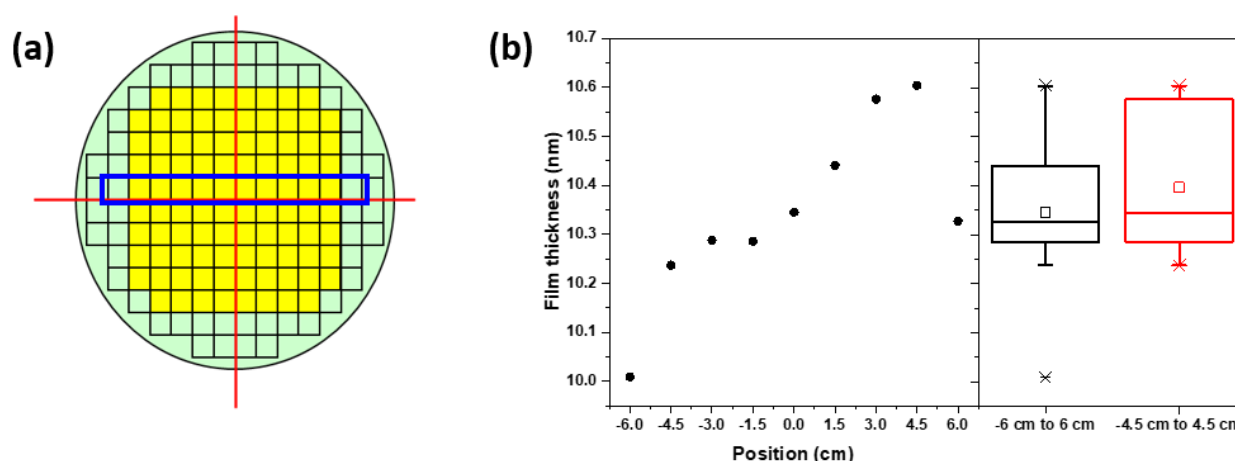

**Fig. S1.** (a) Schematic illustration of 6-inch wafer diced for photoanode experiments. The yellow region represents selected homogeneous region. The blue region represents where the  $\text{TiO}_2$  film thickness distribution was examined. (b) Spectroscopic ellipsometry result for the  $\text{TiO}_2$  film thickness. Box plot for the  $\text{TiO}_2$  thickness distribution was obtained from the blue region in (a) of 6-inch wafer with 10 nm  $\text{TiO}_x$  overlayer. As the thickness at -6 cm apart from the center of wafer is an outlier, we selected yellow region for photoanode experiments.

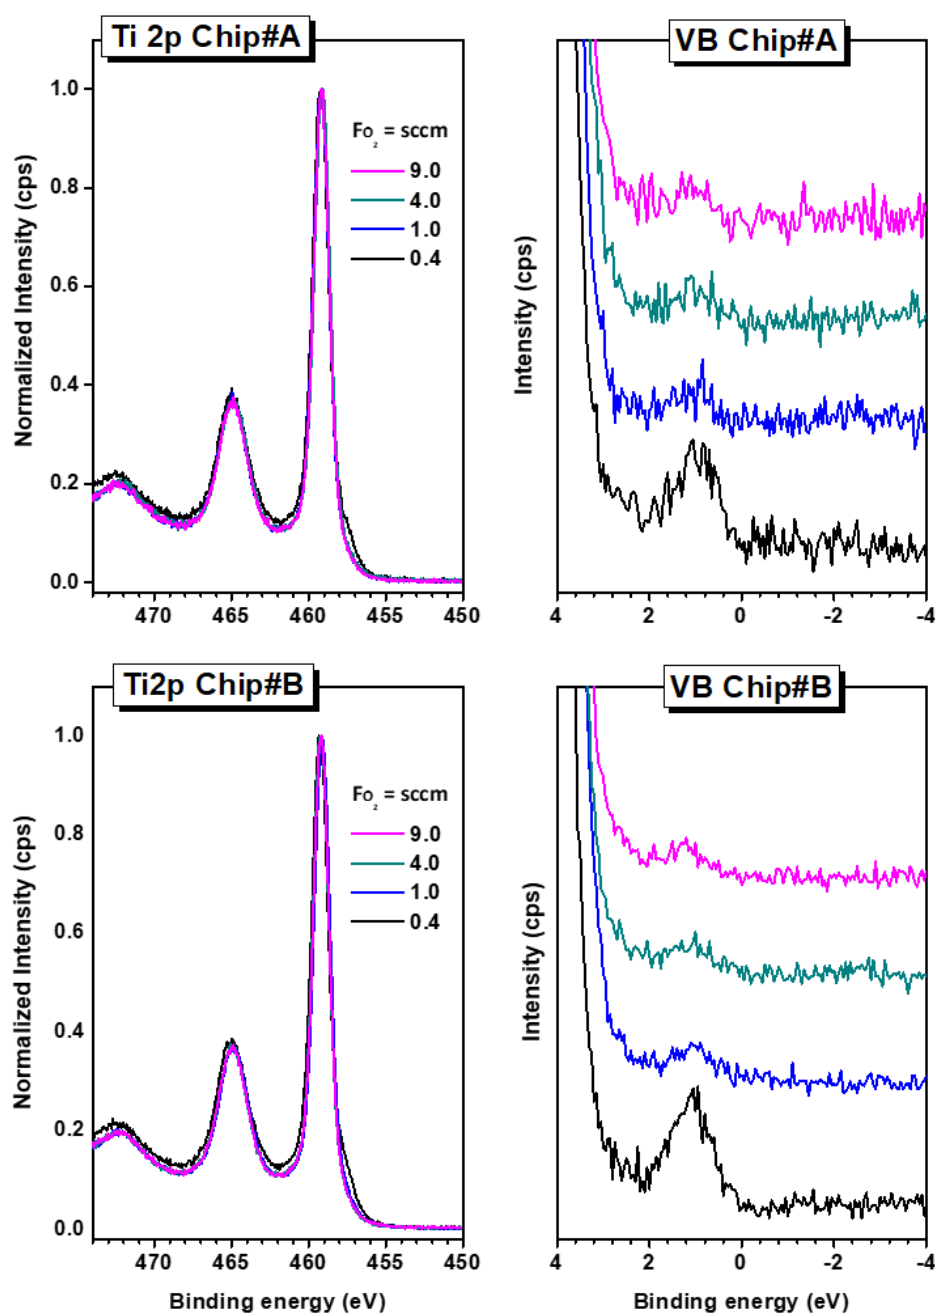

**Fig. S2.** The comparison of Ti 2p and valence band spectra between sample locations within yellow region in a wafer. The results confirm the reproducibility in the quantity of  $Ti^{3+}$  state and defect-related midgap states of  $TiO_x$  within identical sample lot.

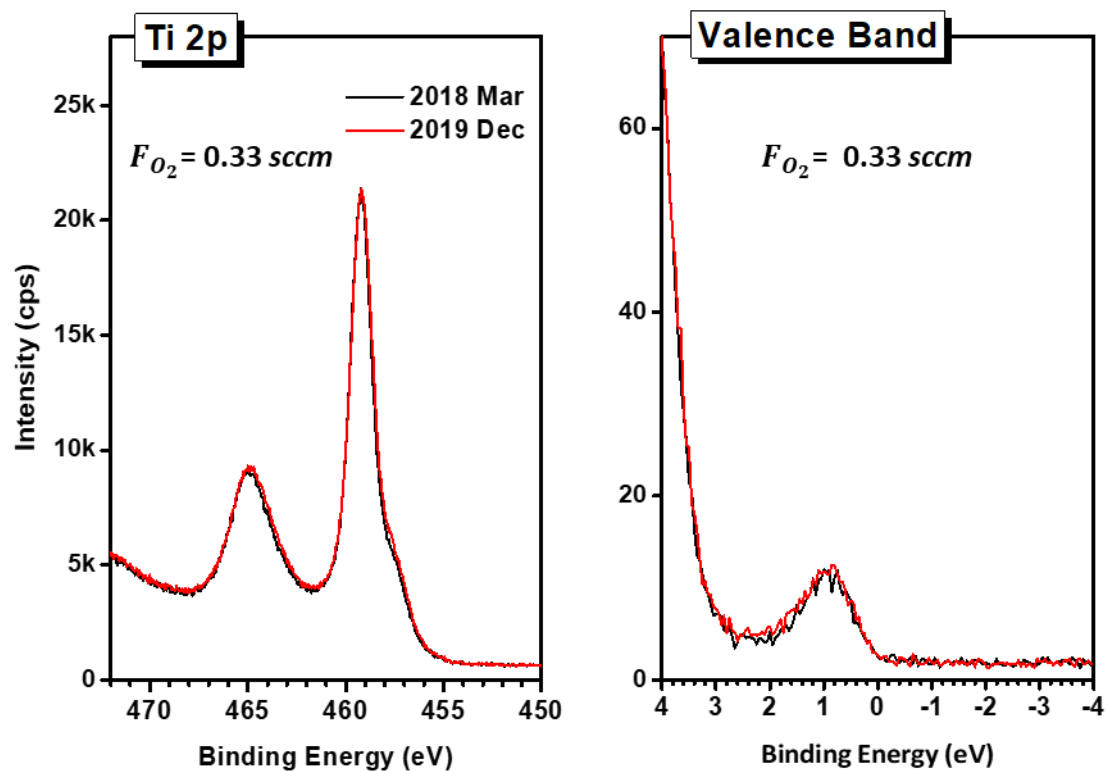

**Fig. S3.** The comparison of Ti 2p and valence band spectra between 0.33 *sccm*-TiO<sub>x</sub> samples fabricated in Dec, 2019 (red) and Mar, 2018 (black). Both samples demonstrated a great reproducibility even though they are fabricated at 18 months apart.

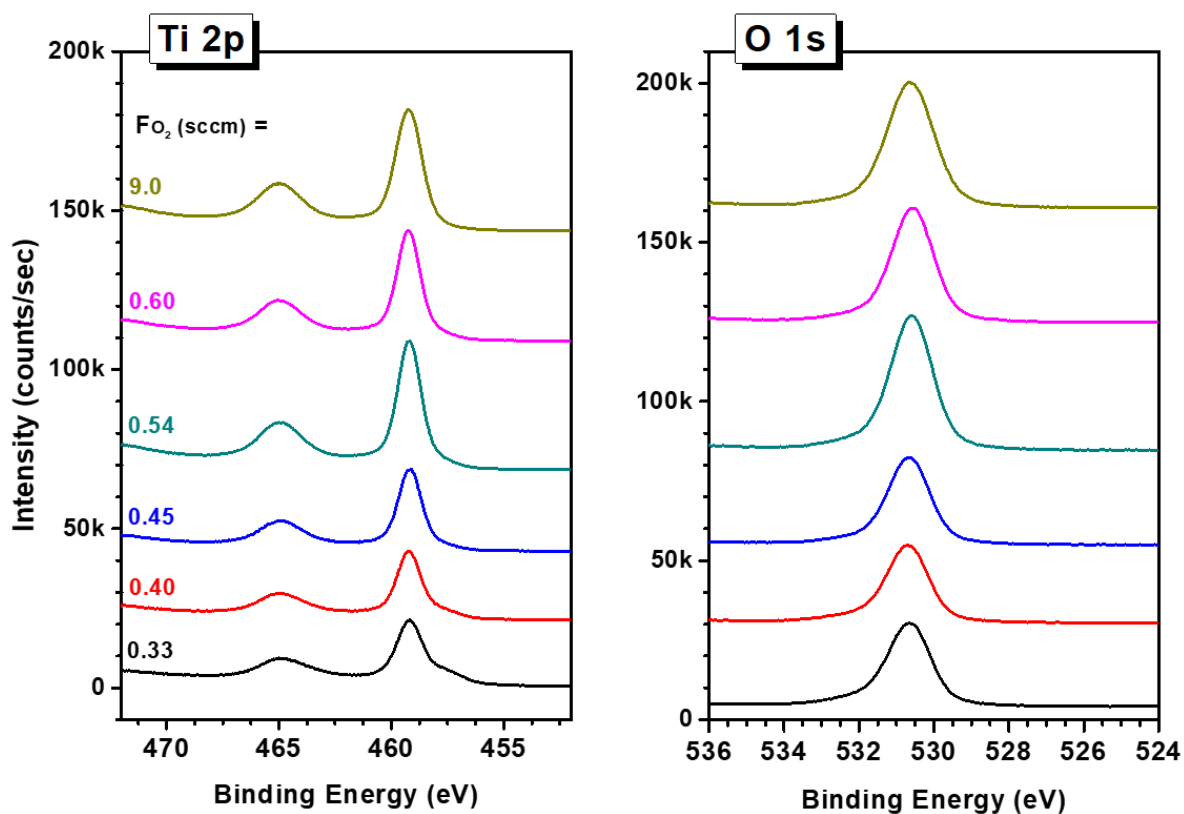

**Fig. S4.** XPS spectra of  $\text{TiO}_x$  films deposited with individual oxygen flow during the sputtering. The peak intensities of Ti 2p and O 1s core level were used for the stoichiometry of  $\text{TiO}_x$ , presented in Table S1.

**Table S1.** Stoichiometry of  $\text{TiO}_x$  films deposited with individual oxygen flow during the sputtering. The stoichiometry was determined by the composition analysis based on core level spectra of Ti 2p and O 1s measured by XPS (Fig. S4). For the composition analysis, we used relative sensitivity factor for each core level provided by XPS manufacturer.

| Oxygen flow<br>(sccm)                    | 0.33                         | 0.40                         | 0.45                         | 0.54                         | 0.60                         | 9.0                          |
|------------------------------------------|------------------------------|------------------------------|------------------------------|------------------------------|------------------------------|------------------------------|
| Stoichiometry<br>of $\text{TiO}_x$ layer | $\text{TiO}_{1.94 \pm 0.02}$ | $\text{TiO}_{1.95 \pm 0.02}$ | $\text{TiO}_{1.96 \pm 0.02}$ | $\text{TiO}_{1.98 \pm 0.02}$ | $\text{TiO}_{1.99 \pm 0.02}$ | $\text{TiO}_{2.00 \pm 0.01}$ |

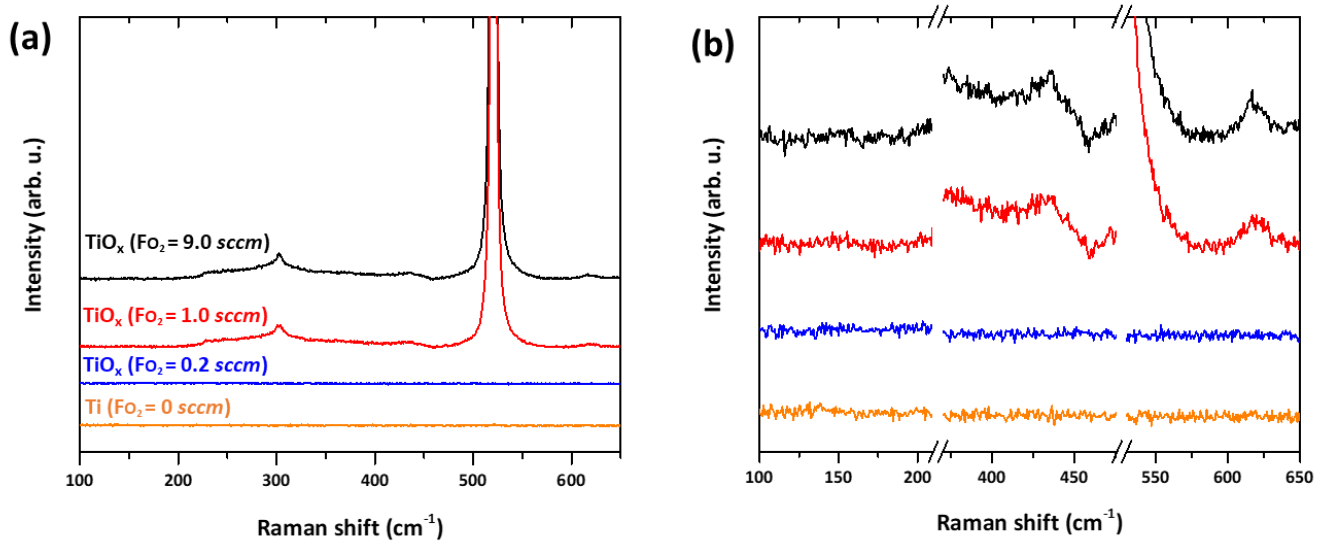

**Fig. S5.** Raman spectra of  $\text{TiO}_x$  films deposited under varying oxygen flow (0-9 *sccm*). (a) Full range Raman spectra of 100-650  $\text{cm}^{-1}$  and (b) broken plot of (a) to clarify the presence of Raman vibrations for crystalline  $\text{TiO}_2$  phase.

It was reported that Raman active modes of rutile  $\text{TiO}_2$  were observed at 143 ( $\text{B}_{1g}$ ), 449 ( $\text{E}_g$ ) and 611  $\text{cm}^{-1}$  ( $\text{A}_{1g}$ ).<sup>1</sup> On the other hand, anatase  $\text{TiO}_2$  showed characteristic peak at 144 ( $\text{E}_g$ ), 397 ( $\text{B}_{1g}$ ), 516 ( $\text{A}_{1g}$ ,  $\text{B}_{1g}$ ), 639  $\text{cm}^{-1}$  ( $\text{E}_g$ ).<sup>1</sup> The absence of characteristic Raman bands for crystalline  $\text{TiO}_2$  phase suggests that the deposited  $\text{TiO}_x$  film is amorphous. The peaks measured at 302  $\text{cm}^{-1}$ , 433  $\text{cm}^{-1}$  and 618  $\text{cm}^{-1}$  are associated with two-phonon Raman scattering of transverse acoustic mode (TA) at  $X$  critical point, scattering involving phonons along  $\Sigma$ , and a combination of TA and transverse optical (TO) phonons in the  $\Sigma$  direction, respectively.<sup>2, 3</sup>

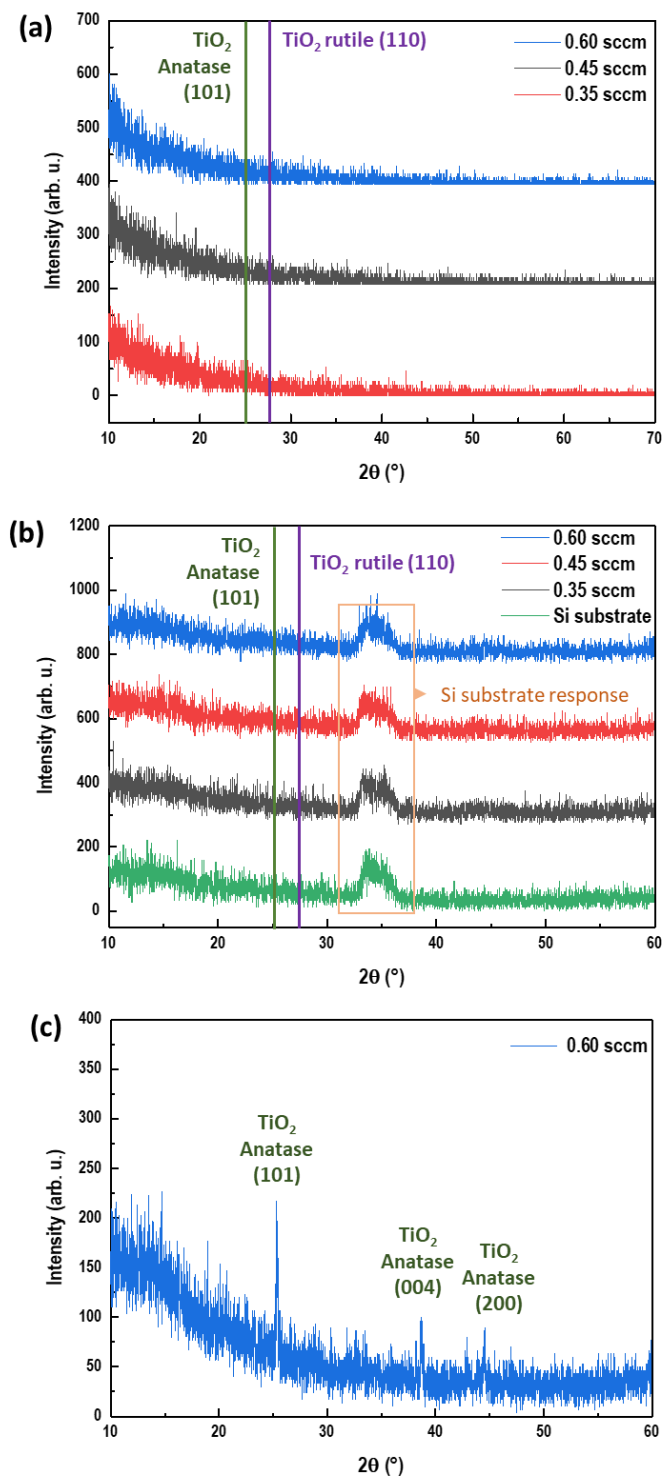

**Fig. S6.** Crystallinity of 50 nm  $\text{TiO}_x$  films deposited under varying oxygen flow (0.35 ~ 0.60 sccm). (a) Grazing incidence X-ray diffraction (GIXRD) and (b) conventional  $\theta/2\theta$  mode XRD of the 50 nm  $\text{TiO}_x$  films. All samples exhibited no characteristic crystalline  $\text{TiO}_2$  phase, which suggests the deposited  $\text{TiO}_x$  film is amorphous. (c) Conventional  $\theta/2\theta$  mode XRD of 50 nm 0.6 sccm- $\text{TiO}_x$  film annealed at 500°C for 1 h under Ar in tube furnace to form anatase crystalline  $\text{TiO}_2$  phase.

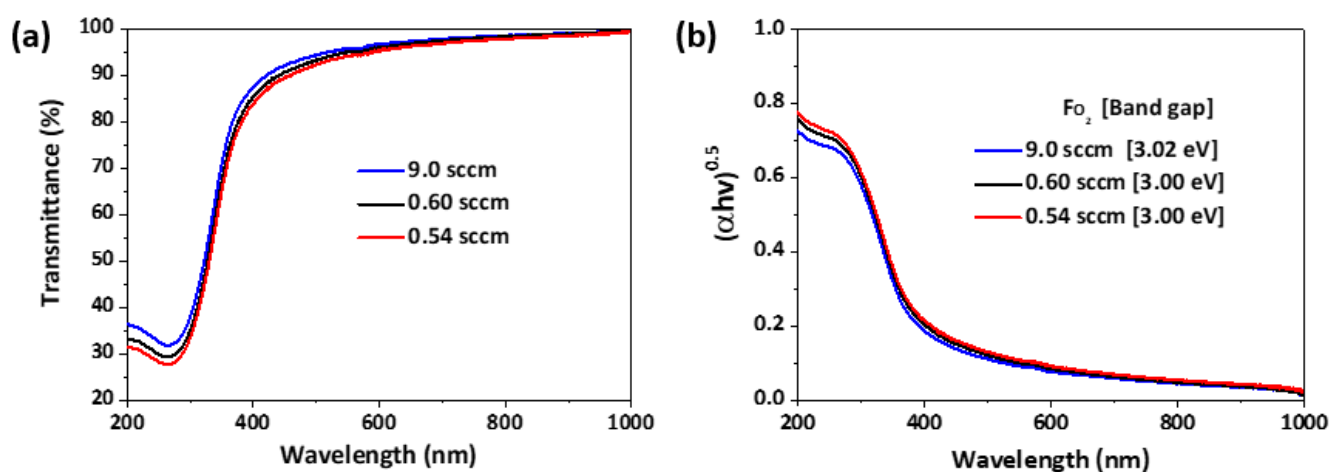

**Fig. S7.** Optical properties of 10 nm-thick  $\text{TiO}_x$  films deposited on quartz substrate with various oxygen flow.

(a) Transmittance and (b) Tauc plots of each  $\text{TiO}_x$  film.

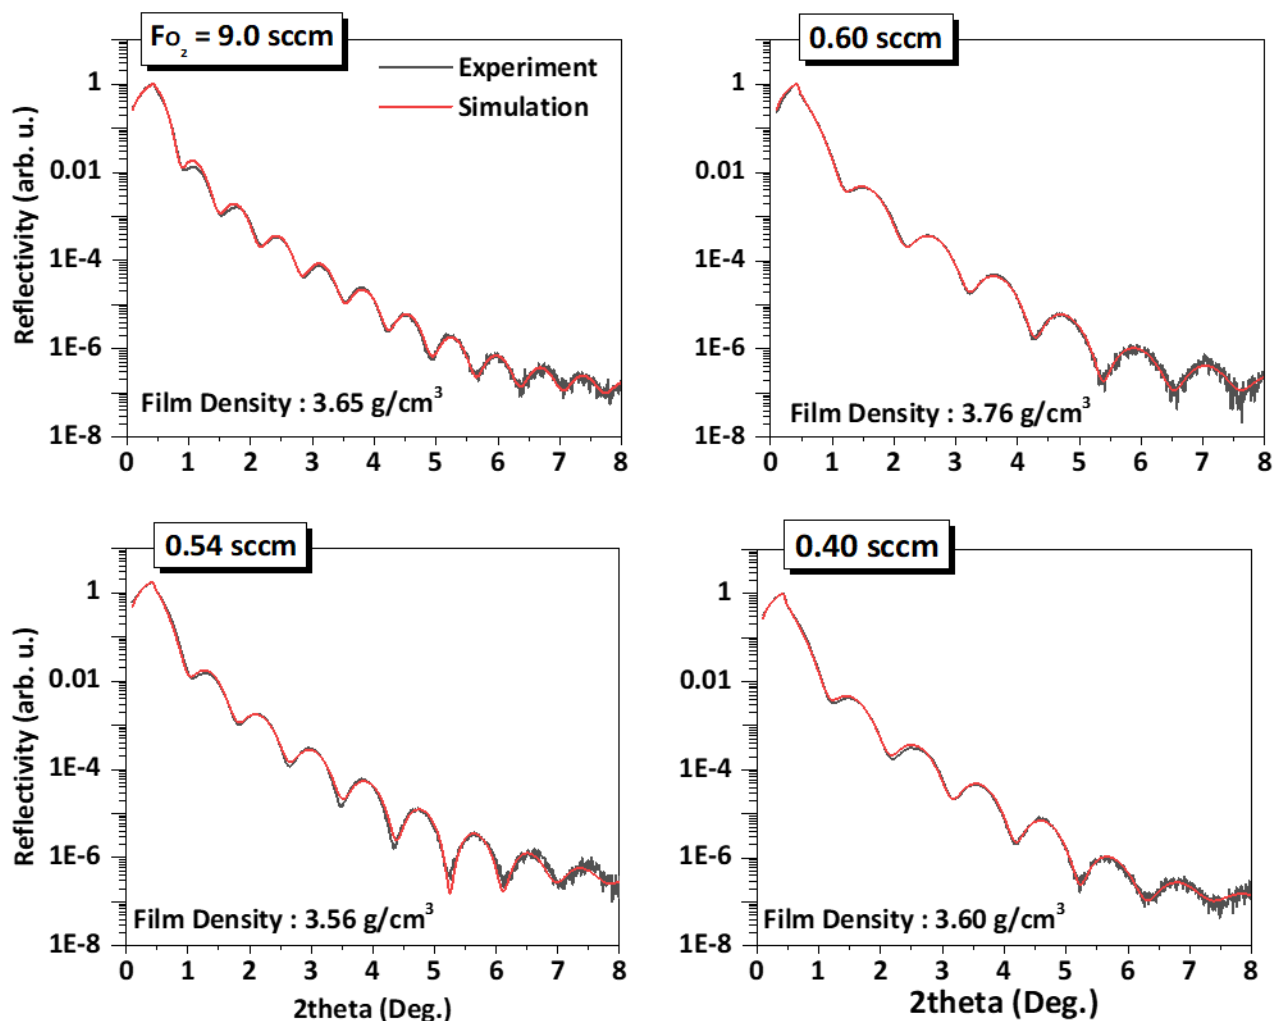

**Fig. S8.** Correlation between deposition condition and film density of various  $\text{TiO}_x$  films: X-ray Reflectivity (XRR) pattern and simulated film density. All the films represent the film density ranging from  $3.56 \text{ g/cm}^3$  to  $3.76 \text{ g/cm}^3$ , which are comparable to previously reported density, approximately  $3.25\text{--}3.68 \text{ g/cm}^3$ , of  $\text{TiO}_2$  film<sup>4-6</sup>. There is no correlation between the film density and the oxygen flow. To determine the best fit of the measured XRR spectrum, we consider a two-layer model including interfacial native  $\text{SiO}_x$  less than 1 nm and  $\text{TiO}_x$  to investigate the density and thickness of deposited films. In addition, the simulated XRR data further supported that the thickness of deposited films is approximately 10 nm.

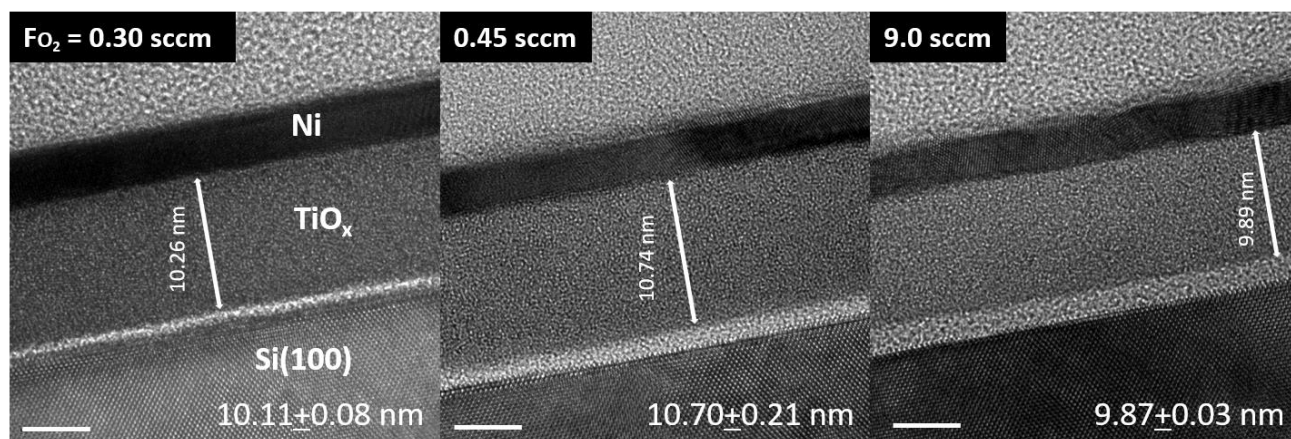

**Fig. S9.** Cross-sectional TEM images of  $n$ -Si/TiO<sub>x</sub>/Ni photoanode fabricated with individual oxygen flow (scale bar = 5 nm). The mean and standard deviation of TiO<sub>x</sub> thickness was obtained from nine independent analysis, and shown as caption at the bottom of figure.

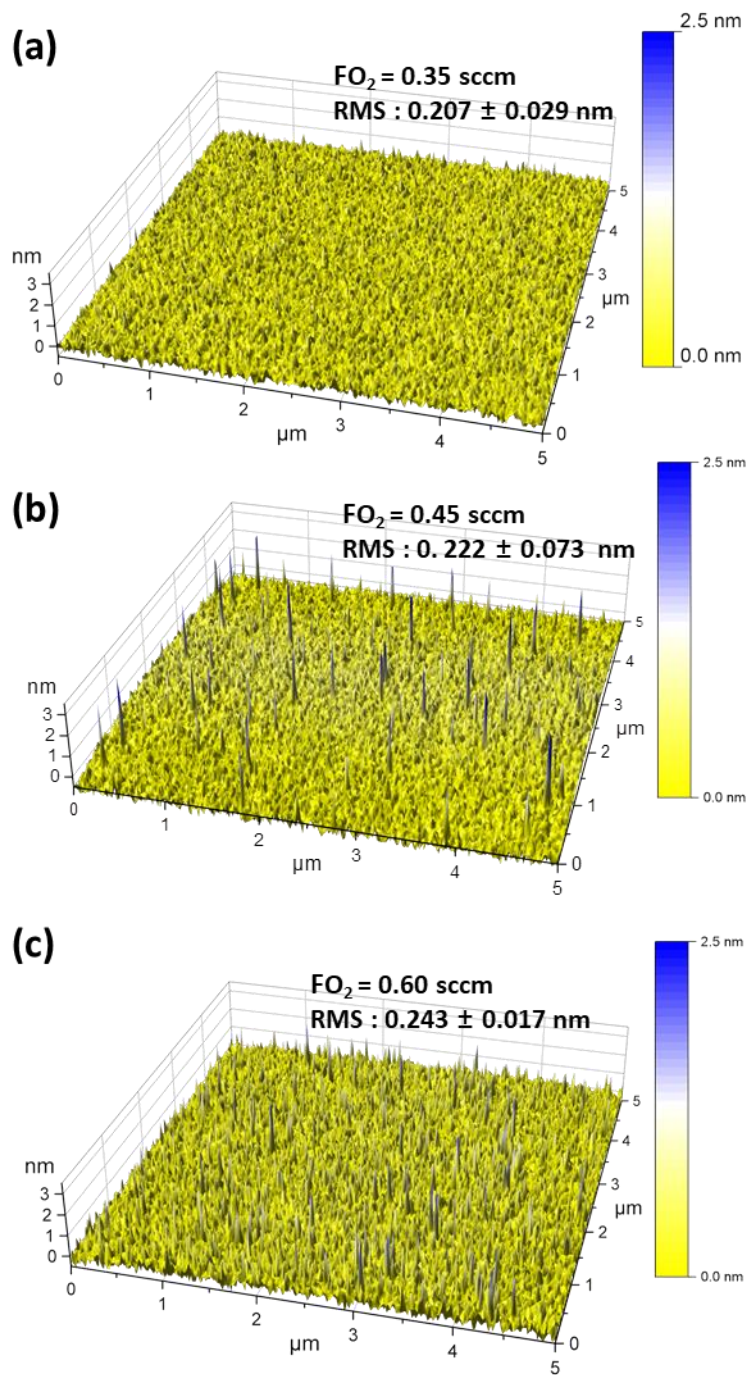

**Fig. S10.** Atomic force microscopy (AFM) morphology images of  $n\text{-Si/TiO}_x\text{/Ni}$  photoanode examined in Figs. 1 and 2. The  $\text{O}_2$  flow for the  $\text{TiO}_x$  layers is (a) 0.35, (b) 0.45 and (c) 0.60 *sccm*. RMS roughness is indicated in the figures. The standard deviation was calculated by multiple measurements on different surface area and sample.

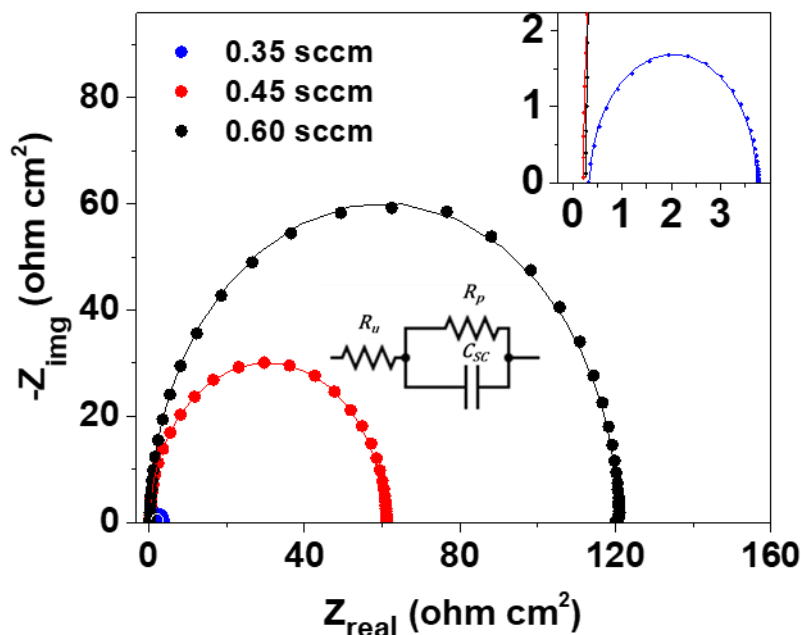

**Fig. S11.** Impedance spectroscopy (IS) analysis of 10 nm-thick  $\text{TiO}_x$  films and their equivalent circuits.  $\text{TiO}_x$  films (10 nm) and Ni co-catalyst layer (3.3 nm) were deposited on  $p^+$ -Si wafer ( $0.004 \Omega\text{-cm}$ ) to examine the electrical properties of only  $\text{TiO}_x$  films while excluding the influence of the substrate. In addition, ohmic contacted front metal contacts by using thermal evaporated Al (about 500 nm) were formed on  $\text{TiO}_x/\text{Ni}$ , while back ohmic contacts were formed using In-Ga eutectic, to eliminate the influence of electrolyte as well. The device structure is In-Ga eutectic alloy/ $p^+$ -Si wafer ( $0.004 \Omega\text{-cm}$ )/ $\text{TiO}_x$  (10 nm)/Ni (3.3 nm)/Al. In order to quantify the impact of defect concentration on electrical properties, Nyquist plots were fitted to simplified Randle cells (inset of Fig. S11). The simplified Randles cell represents series resistance ( $R_u$ ), charge transfer resistance ( $R_p$ ), and space charge capacitance ( $C_{sc}$ ) of the  $\text{TiO}_x$  of the solid-state device. The semicircle response of  $\text{TiO}_x$  deposited in 0.60 sccm demonstrated the largest semicircle, while the 0.35 sccm sample showed the smallest. The impedance spectroscopy was performed at a DC bias of 0 V by sweeping between 1 MHz and 0.2 Hz and using a sine-wave amplitude of 5.0 mV.

**Table S2.** Summary of equivalent circuit fitting from the impedance spectroscopy (Fig. S11) of various TiO<sub>x</sub> film.

| Oxygen flow<br>( <i>sccm</i> ) | $R_p$ (ohm·cm <sup>2</sup> ) | $R_u$ (ohm·cm <sup>2</sup> ) | $C_{SC}$ (μF·cm <sup>-2</sup> ) | Specific conductance<br>(nS·cm <sup>-1</sup> ) |
|--------------------------------|------------------------------|------------------------------|---------------------------------|------------------------------------------------|
| 0.35                           | 3.4                          | 0.344                        | 3.91                            | 219.8                                          |
| 0.45                           | 60.2                         | 0.211                        | 2.91                            | 16.7                                           |
| 0.60                           | 120.3                        | 0.266                        | 2.41                            | 10.0                                           |

In this analysis, all three samples demonstrated very small  $R_u$  ( $\ll 0.35 \Omega \text{ cm}^2$ ) since the  $R_u$  arises from the metal to semiconductor junction, not from a solution to semiconductor junction. The primary contribution to  $C_{SC}$  is space charge capacitance of the TiO<sub>x</sub> rather than double-layer capacitance due to the existence of metal-semiconductor junction. In comparison with TiO<sub>x</sub> deposited in 0.60 and 0.45 *sccm*, the 0.35 *sccm* sample showed dramatically decreased charge transfer resistance, which demonstrates the direct correlation between the defect concentration and the conductivity of TiO<sub>x</sub> films. In addition to the charge transfer resistance, the TiO<sub>x</sub> with the highest defect concentration showed higher film capacitance, which likely represents the increased defect concentration of the TiO<sub>x</sub> films<sup>7</sup>. Specific conductance was calculated with following equation.

$$\text{Specific conductance} = \frac{\varepsilon_{TiO_x} \varepsilon_0}{R_p C_{SC}}$$

where  $\varepsilon_{TiO_x}$  is dielectric constant of TiO<sub>x</sub> and  $\varepsilon_0$  is vacuum permittivity.

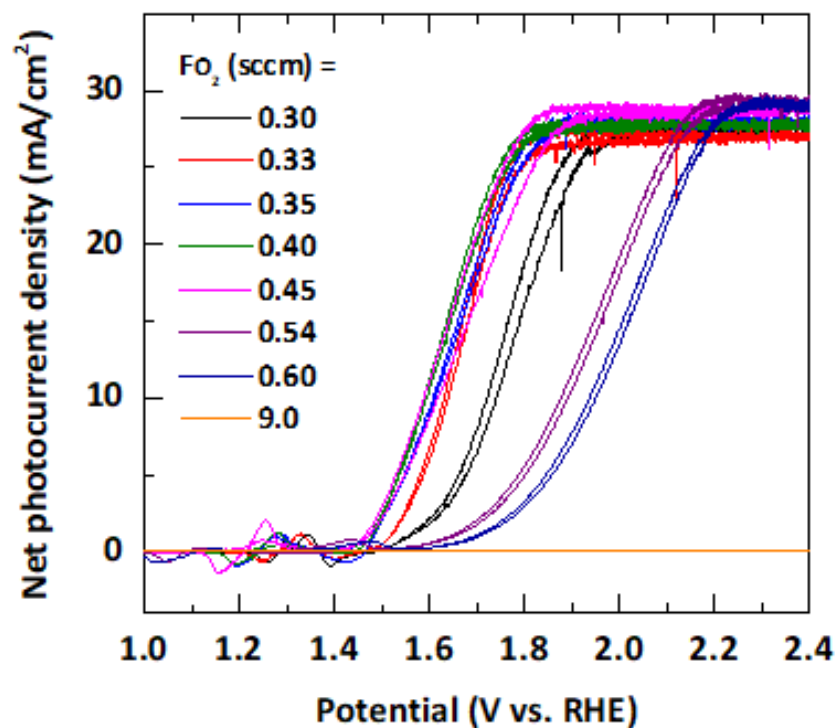

**Fig. S12.** Stirred cyclic voltammetry of TiO<sub>x</sub> protected *n*-Si photoanodes plotted as net photocurrent vs. potential depicted in Fig. 2c. The net photocurrent density was determined by subtracting the dark current density from the total saturation photocurrent density.

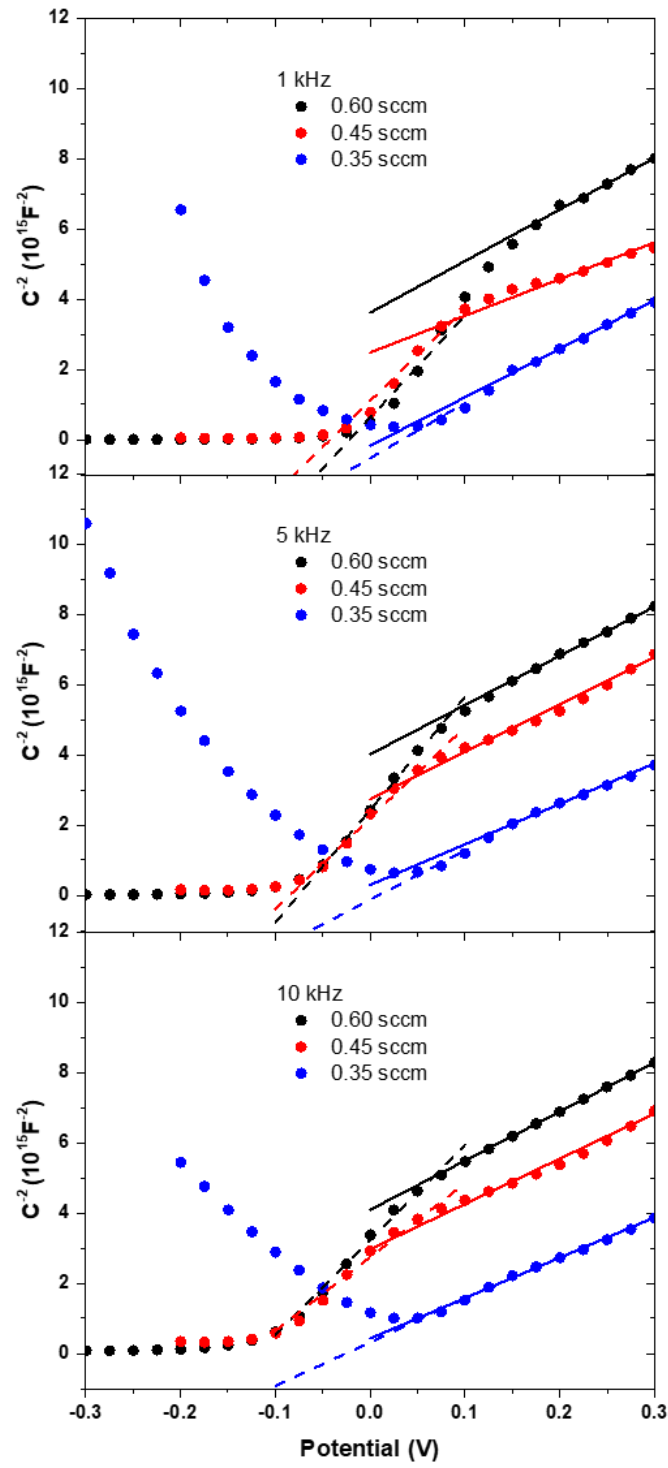

**Fig. S13.** Solid state Mott-Schottky (MS) plot for  $n$ -Si/ $\text{TiO}_x$  (50 nm)/Ni photoanodes fabricated with each oxygen flow obtained in air. Linear fitting results related to the  $n$ -Si substrate and  $\text{TiO}_x$  overlayer are shown as solid and dashed lines, respectively.

**Table S3.** MS parameters of *n*-Si photoanodes with protective TiO<sub>x</sub> films deposited at 0.60, 0.45, and 0.35 *sccm*, measured at 1 and 10 kHz AC modulation. Previously reported dielectric constant of Si and a-TiO<sub>2</sub> was used for the calculation of carrier density.

| Photoanode<br>Component<br>(AC modulation<br>= 1 kHz)  | Mott-Schottky<br>parameters        | Oxygen Flow ( <i>sccm</i> ) |        |        |
|--------------------------------------------------------|------------------------------------|-----------------------------|--------|--------|
|                                                        |                                    | 0.35                        | 0.45   | 0.60   |
| <i>n</i> -Si<br>$\epsilon = 12$                        | $V_{fb}$<br>(V)                    | 0.012                       | -0.237 | -0.246 |
| TiO <sub>x</sub><br>$\epsilon = 33$                    | Slope<br>( $10^{15}F^{-2}V^{-1}$ ) | 15.66                       | 26.20  | 29.07  |
| Photoanode<br>Component<br>(AC modulation<br>= 10 kHz) | Mott-Schottky<br>parameters        | Oxygen Flow ( <i>sccm</i> ) |        |        |
|                                                        |                                    | 0.35                        | 0.45   | 0.60   |
| <i>n</i> -Si<br>$\epsilon = 12$                        | $V_{fb}$<br>(V)                    | -0.037                      | -0.231 | -0.293 |
| TiO <sub>x</sub><br>$\epsilon = 33$                    | Slope<br>( $10^{15}F^{-2}V^{-1}$ ) | 12.43                       | 21.02  | 27.10  |

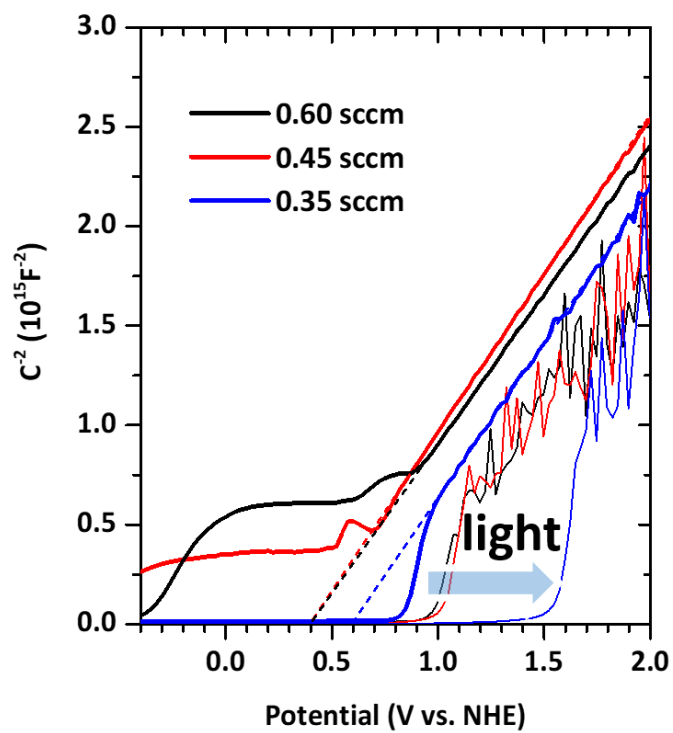

**Fig. S14.** MS data for  $n$ -Si/TiO<sub>x</sub> (50 nm)/Ni photoanodes in 1 M KOH measured in the dark (thick lines) and under 1-sun illumination (thin lines). The shift in the capacitance response relates to the photo-generated carriers.

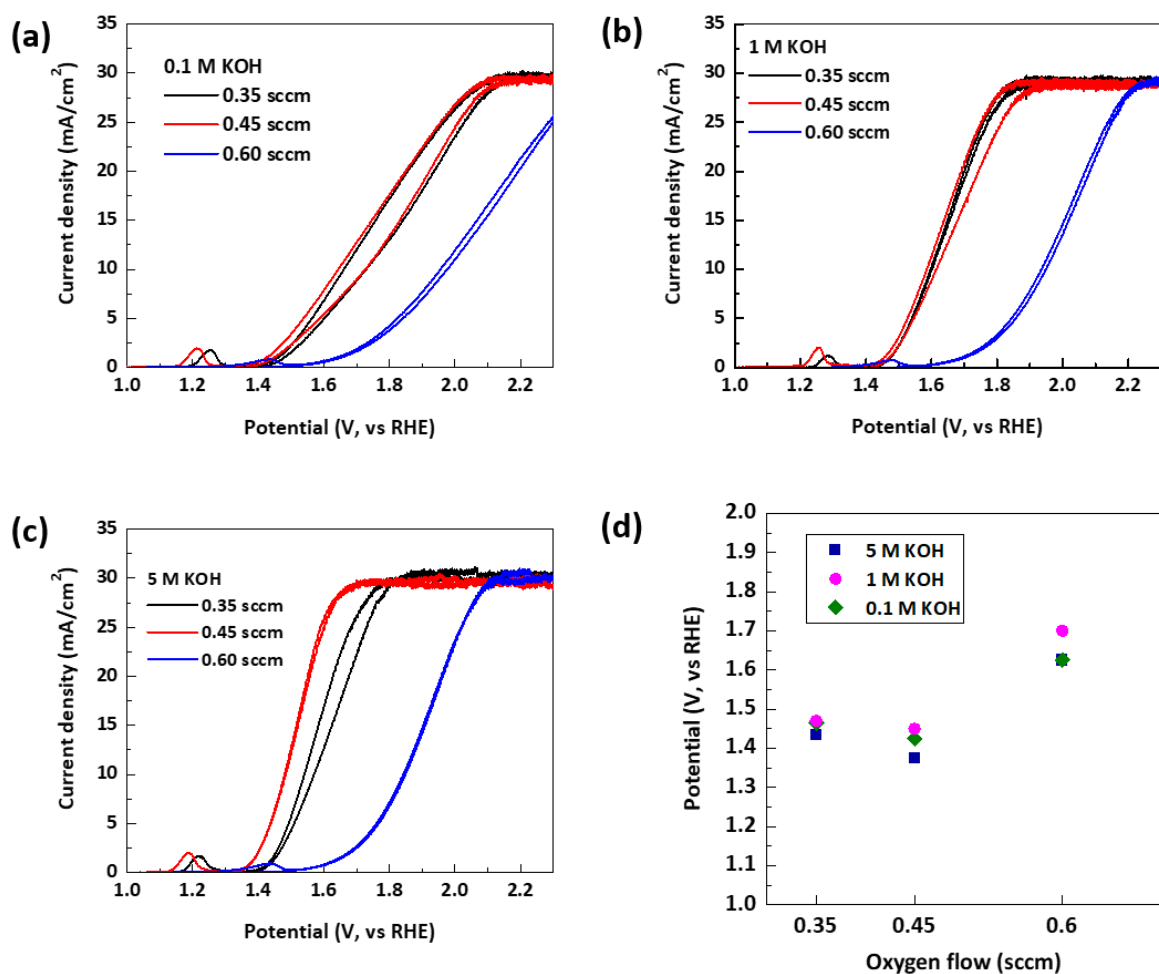

**Fig. S15.** Stirred cyclic voltammetry of  $n$ -Si/TiO<sub>x</sub> (10 nm)/Ni photoanodes under (a) 0.1 M, (b) 1 M, and (c) 5 M KOH electrolyte. (d) Plot of overpotential at 1 mA/cm<sup>2</sup> of each photoanode measured at the different electrolyte concentration.

In order to explore the universality of proposed mechanism, the PEC activity of 10 nm TiO<sub>x</sub> protected  $n$ -Si/*sub*-TiO<sub>x</sub>/Ni photoanode was monitored under 0.1 M, 1 M, and 5 M KOH electrolyte. Same with the results performed in 1 M KOH (Fig. 1c and 2b), the 0.45 sccm photoanode showed the best water-splitting activity (0.45 > 0.35 > 0.6 sccm). It can be concluded that the defect density of TiO<sub>x</sub> layer is directly related to the water-splitting activity of  $n$ -Si photoanode. This result shows that electrolyte with lower ion concentration induces the higher overpotential as well as the decreased squareness in J-V curve. Although the slight changes in J-V curves were observed, the same tendency of PEC activity depending on defect density of TiO<sub>x</sub> was observed for all electrolyte concentrations. It supports that the proposed mechanism is also valid in diluted (0.1 M) and concentrated (5 M) electrolyte.

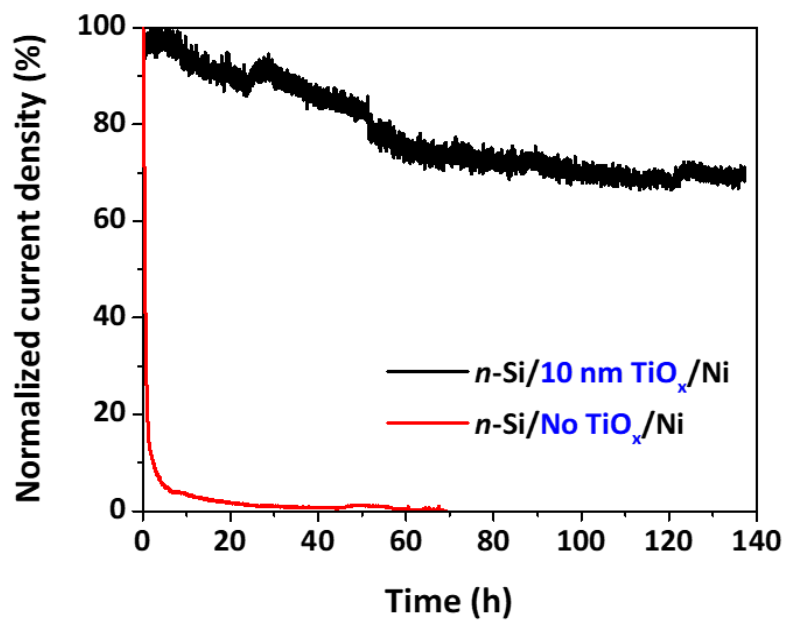

**Fig. S16.** Chronoamperometry of  $n\text{-Si}$  photoanode with (black) and without (red) 10 nm  $\text{TiO}_x$  (0.45 *sccm*) protection layer during water oxidation in 1.0 M  $\text{KOH}(aq)$  under simulated 1-sun illumination ( $V=2.0\text{ V}$  vs RHE).

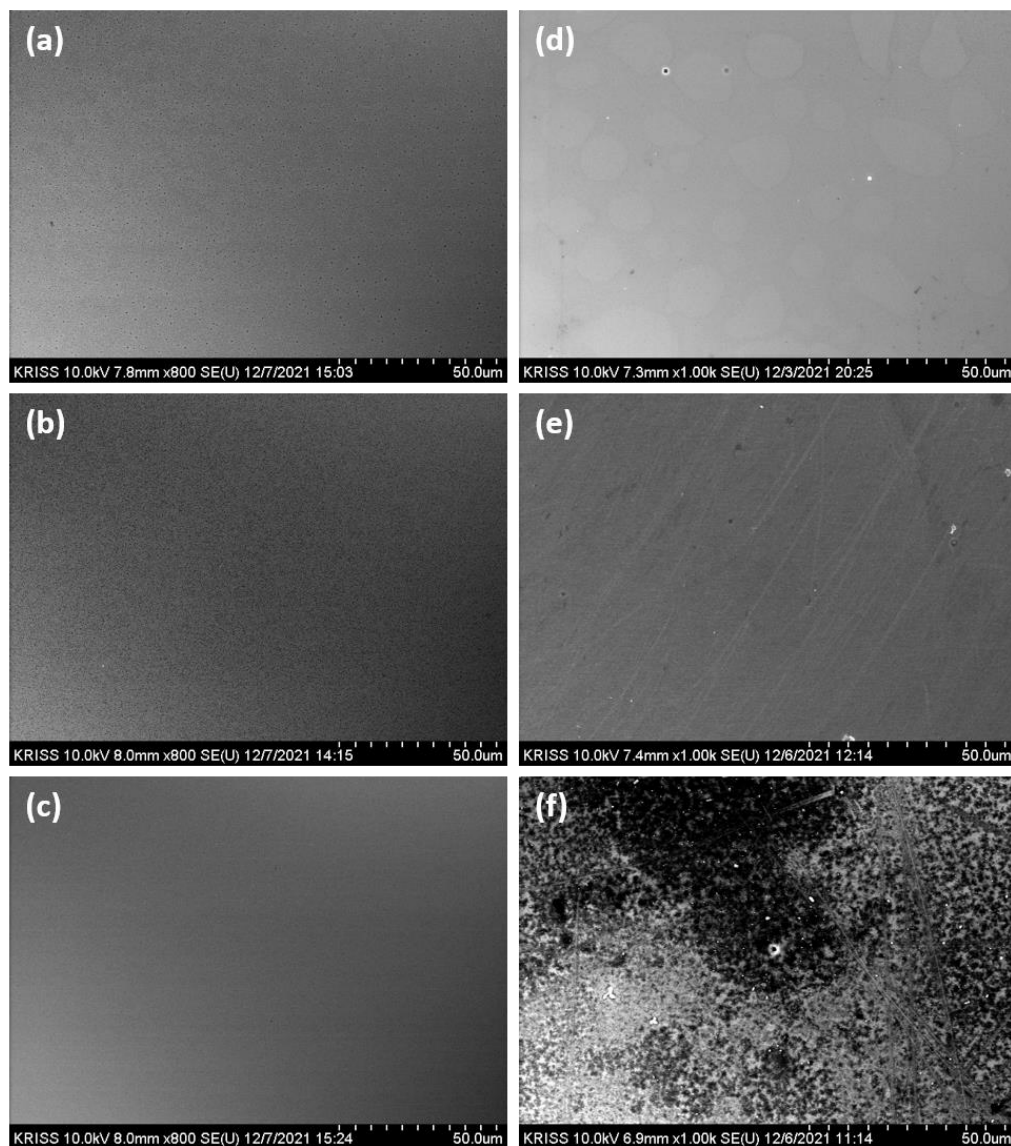

**Fig. S17.** Top-view SEM images of pristine *n*-Si photoanode protected by 50 nm of TiO<sub>x</sub> deposited in (a) 0.35, (b) 0.45, and (c) 0.60 *sccm* of O<sub>2</sub> flow. 3.3 nm-thick Ni cocatalyst was deposited onto TiO<sub>x</sub> layer all on *n*-Si. (d-f) Top-view SEM images of various *n*-Si/TiO<sub>x</sub>/Ni photoanodes after the chronoamperometry depicted in Fig. 6. The O<sub>2</sub> flow for the three TiO<sub>x</sub> layers is (d) 0.35, (e) 0.45 and (f) 0.60 *sccm*.

As increasing the O<sub>2</sub> flow, the PEC reaction-induced surface damage is more clearly visible as demonstrated in Figs. S17d-f. The 0.60 *sccm* sample (Fig. S17f) shows uncountable surface scratches and pin holes, but the 0.35 *sccm* sample surface exhibits the least damaged. The surface morphology observed in the SEM images directly correlates with the chronoamperometry result depicted in Fig. 6.

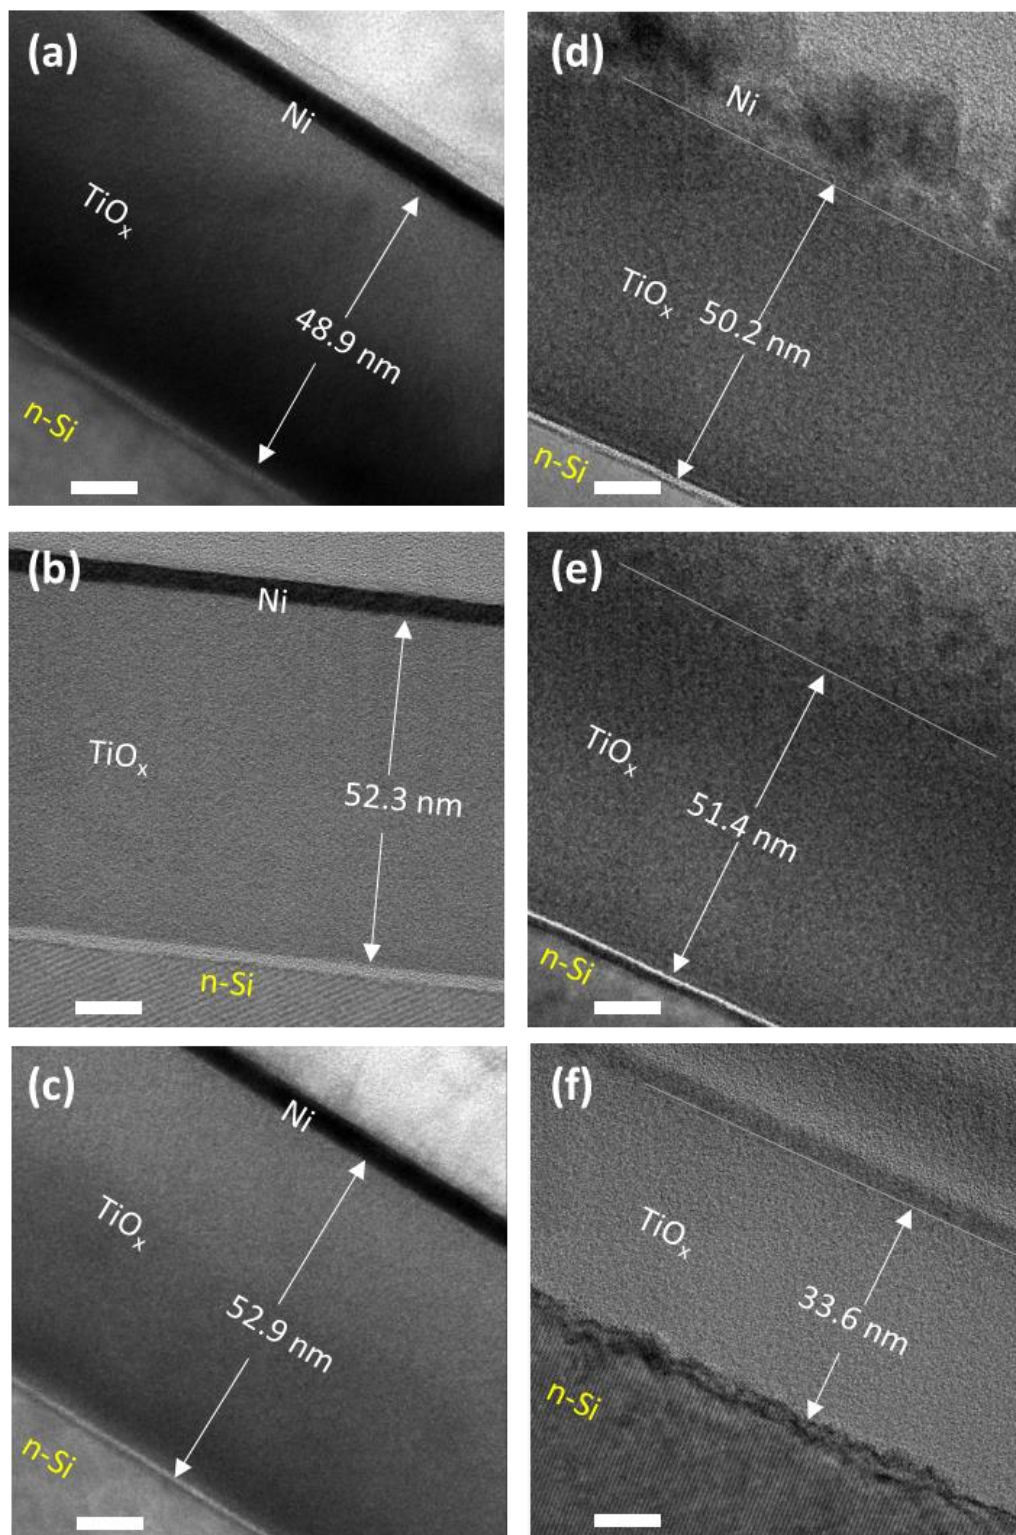

**Fig. S18.** Cross-sectional TEM images of pristine n-Si photoanode protected by 50 nm of TiO<sub>x</sub> deposited in (a) 0.35, (b) 0.45, and (c) 0.60 sccm of O<sub>2</sub> flow. Approximately 3.3 nm-thick Ni cocatalyst was deposited onto TiO<sub>x</sub> layer all on n-Si. (d-f) Cross-sectional TEM images of various n-Si/TiO<sub>x</sub>/Ni photoanodes after the chronoamperometry depicted in Fig. 6. The O<sub>2</sub> flow for the three TiO<sub>x</sub> layers is (d) 0.35, (e) 0.45 and (f) 0.60 sccm. The length of scale bar is 10 nm.

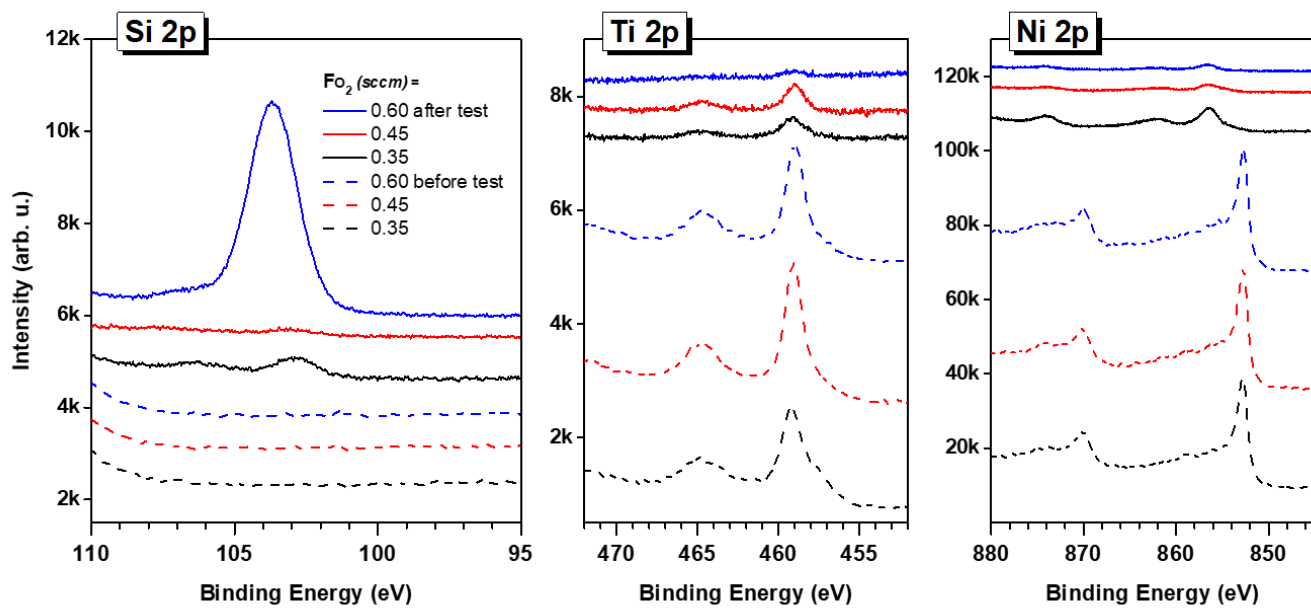

**Fig. S19.** Si 2p, Ti 2p and Ni 2p core level of n-Si/TiO<sub>x</sub>/Ni photoanodes deposited in 0.35, 0.45, and 0.60 *sccm* of O<sub>2</sub> flow before (dashed line) and after (solid line) the stability test depicted in Fig. 6.

## Reference

1. G. Tompsett, G. Bowmaker, R. Cooney, J. Metson, K. Rodgers and J. Seakins, *J. Raman Spectrosc.*, 1995, **26**, 57-62.
2. D. Zhigunov, G. Kamaev, P. Kashkarov and V. Volodin, *Appl. Phys. Lett.*, 2018, **113**, 023101.
3. P. A. Temple and C. Hathaway, *Phys. Rev. B*, 1973, **7**, 3685.
4. B. D. Piercy, C. Z. Leng and M. D. Losego, *J. Vac. Sci. Technol. A*, 2017, **35**, 03E107.
5. D. Mergel, D. Buschendorf, S. Eggert, R. Grammes and B. Samset, *Thin Solid Films*, 2000, **371**, 218-224.
6. O. Anderson, C. R. Ottermann, R. Kuschnerreit, P. Hess and K. Bange, *Fresenius J. Anal. Chem.*, 1997, **358**, 315-318.
7. T. Zhai, S. Xie, M. Yu, P. Fang, C. Liang, X. Lu and Y. Tong, *Nano Energy*, 2014, **8**, 255-263.
